# Supplementary material for: Improving the photocatalytic H2 evolution activity of Keggin polyoxometalates anchoring copper-azole complexes
Source: Royal Society of Chemistry journal article supplement (doi:10.1039/d1gc00692d), 2021-01-01
Supplement: d1gc00692d1.pdf [file d1gc00692d1.pdf]

Electronic Supporting Information

## **Improving the photocatalytic H<sub>2</sub> evolution activity of Keggin polyoxometalates anchoring copper-azole complexes†**

Qingbo Shen,<sup>ab</sup> Carlos J. Gómez-García,<sup>c</sup> Wenlong Sun,<sup>ab</sup> Xiaoyong Lai<sup>d</sup>, Haijun Pang<sup>\*a</sup> and Huiyuan Ma<sup>\*a</sup>

### ***Section 1 Experimental***

1. Materials and General Methods
2. Preparation of the Modified Electrodes
3. Synthesis of compounds **1** and **2**
4. X-ray Crystallography
5. General process of photocatalytic hydrogen evolution

### ***Section 2 Supplementary Experimental Characterizations***

1. **Figure S1.** View of the asymmetric unit of **1**. All hydrogen atoms and free water molecules are omitted for clarity.
2. **Figure S2.** View of the structures of the Cu-azole complexes: a-c for compound **1** and d for compound **2**.
3. **Figure S3.** View of the three coordination modes of the deprotonated 2-ptz<sup>-</sup> ligands in compound **1**.
4. **Figure S4.** View of the structure of **2**. All hydrogen atoms and crystallization water molecules are omitted for clarity. (Symmetry codes: #1: x, 1-y, z)
5. **Figure S5.** High-resolution XPS spectra of the Cu(2p) and W(4f) region for compounds **1** and **2** before photocatalysis.
6. **Figure S6.** Experimental IR spectra of compounds **1** and **2** before (black lines) and after (blue and red lines) photocatalysis.
7. **Figure S7.** Simulated (black) PXRD diffractograms before (blue and red) and after (green) photocatalysis for compounds **1** and **2**.

8. **Figure S8.** Solid state UV-Vis absorption spectra of compound **1**, compound **2** and GeW<sub>12</sub> polyanion.
9. **Table S1.** Photocatalytic H<sub>2</sub> production conditions for compounds **1** and **2**.
10. **Figure S9.** Optical images: (a) Suspension of compound **1** before irradiation. (b) Heteropolyblue (HPB) suspension of compound **1** after irradiation (Xe lamp off); (c) HPB suspension of compound **1** under irradiation (Xe lamp on); (d) Suspension of compound **1** after exposure to O<sub>2</sub>.
11. **Figure S10.** Solution UV-Vis absorption spectrum of the HPB state of compound **1** after exposure to a continuous flow of O<sub>2</sub>.
12. **Figure S11.** Comparison of the photocatalytic H<sub>2</sub> evolution rates of 5 hours for compound **1** for different water:acetone ratios.
13. **Figure S12.** Comparison of the photocatalytic H<sub>2</sub> evolution rates of 5 hours for compound **1** for different sacrificial reagents.
14. **Figure S13.** Comparison of the photocatalytic H<sub>2</sub> evolution rates of 5 hours for compound **1** for different methanol concentrations.
15. **Figure S14.** Comparison of the photocatalytic H<sub>2</sub> evolution rates of 5 hours for compound **2** for different water:acetone ratios.
16. **Figure S15.** Comparison of the photocatalytic H<sub>2</sub> evolution rates of 5 hours for compound **2** for different sacrificial reagents.
17. **Figure S16.** Comparison of the photocatalytic H<sub>2</sub> evolution rates of 5 hours for compound **2** for different methanol concentrations.
18. **Figure S17.** Liquid state UV-Vis absorption spectrum of HPB state of compound **2** under Xe irradiation with 300-400nm wavelength; irradiation time: 0, 1, 3, 5, 7, 9, 11min.
19. **Figure S18.** Comparison of the transient photocurrent responses for compound **1** and the physical mixture of GeW<sub>12</sub> + CuCl<sub>2</sub> + 2-ptz.
20. **Figure S19.** Photoluminescence spectra of compounds **1** and **2** with the excitation wavelength at 300 nm.
21. **Figure S20.** Time evolution of the photocatalytic H<sub>2</sub> production for compound **2**.

22. **Figure S21.** High-resolution XPS spectrum of the W(4f) and Cu(2p) region for compounds **1** and **2** after photocatalysis.

23. **Figure S22.** CV curve of compound **2** in a 0.5 M H<sub>2</sub>SO<sub>4</sub> solution (pH = 0.28) with a scan rate of 0.1 V s<sup>-1</sup>.

24. **Figure S23.** (a) HPBs state of compound **1** solution under Xe light ( $\lambda > 350$  nm). (b) HPBs state of compound **1** solution after irradiation with  $\lambda > 400$  nm.

25. **Figure S24.** Solution UV-Vis absorption spectrum of the HPB state of compound **2** after exposure to a continuous flow of O<sub>2</sub>.

26. **Figure S25.** CV curve of GeW<sub>12</sub> precursor in a 0.5 M H<sub>2</sub>SO<sub>4</sub> solution (pH = 0.28) with a scan rate of 0.1 V s<sup>-1</sup>. (vs. Ag/AgCl)

### ***Section 3 Supplementary Discussion***

1. The photocatalytic mechanism for GeW<sub>12</sub> (without copper)

### ***Section 4 References***

## ***Section 1 Experimental Section***

### **1. Materials and General Methods**

All reagents are commercially available and were used as received without further purification. C, H and N elemental analyses were performed on a Perkin-Elmer 2400 CHN elemental analyser and for Ge, W and Cu on a Leaman inductively coupled plasma (ICP) spectrometer. The Fourier transform infrared (FT-IR) spectrum was recorded with KBr pellets in the range 4000-400  $\text{cm}^{-1}$  with a Nicolet AVATAR FT-IR360 spectrometer. The powder X-ray diffraction (PXRD) data were collected on a Rigaku RINT2000 diffractometer at room temperature. Optical properties were also studied by diffuse reflectance UV-vis spectroscopy (Lambda 35 spectrometer). Liquid UV-vis spectra were performed on a TU-1900 spectrophotometer. W and Cu elements valence were analysed on an X-ray photoelectron spectroscopy spectrometer. A CHI660 electrochemical workstation was used for the cyclic voltammetry measurements (CV), photocurrent-time (I-T) and impedance spectra (EIS). A conventional three-electrode system was used, with glassy carbon (GCE) and ITO glass electrodes as working electrodes, a commercial Ag/AgCl as reference electrode and a platinum wire as counter electrode. The electrochemical CV curves were carried out in 0.5 M  $\text{H}_2\text{SO}_4$  solution at the scan rate of 0.1  $\text{V s}^{-1}$ . The photocurrent-time measurements were carried out in 0.25 M  $\text{Na}_2\text{SO}_4$  solution. A 500 W Xenon lamp ( $\lambda > 350 \text{ nm}$ ) was used as the light source during the measurements. Electrochemical impedance spectroscopy (EIS) tests were conducted in the frequency range 0.1 Hz to 100 kHz.

The potentials *vs.* NHE are calculated according to the equation below:<sup>1</sup>

$$E_{\text{NHE}} = E_{\text{Ag/AgCl}} + 0.059 \text{ pH} + E_{\text{Ag/AgCl}}^0 \text{ (NHE at pH = 0)}.$$

For converting the obtained reduction potential (*vs.* Ag/AgCl) of compound **1** to RHE (NHE at pH = 0)

$$\text{I', } E_{\text{NHE}} = -0.529 \text{ V} + 0.209 \text{ V} = -0.320 \text{ V}$$

$$\text{II', } E_{\text{NHE}} = -0.383 \text{ V} + 0.209 \text{ V} = -0.174 \text{ V}$$

$$\text{III}', E_{\text{NHE}} = -0.189 \text{ V} + 0.209 \text{ V} = +0.020 \text{ V}$$

$$\text{IV}', E_{\text{NHE}} = +0.124 \text{ V} + 0.209 \text{ V} = +0.333 \text{ V}$$

Therefore, the four reduction peak potentials of compound **1** are -0.320 V (I'), -0.174 V (II'), +0.020 V (III') and +0.333 V (IV') (*vs.* NHE), respectively.

We convert the reduction potential (*vs.* Ag/AgCl) of compound **2** to RHE (NHE at pH = 0).

$$\text{I}', E_{\text{NHE}} = -0.560 \text{ V} + 0.209 \text{ V} = -0.351 \text{ V}$$

$$\text{II}', E_{\text{NHE}} = -0.402 \text{ V} + 0.209 \text{ V} = -0.193 \text{ V}$$

$$\text{III}', E_{\text{NHE}} = -0.248 \text{ V} + 0.209 \text{ V} = -0.039 \text{ V}$$

$$\text{IV}', E_{\text{NHE}} = +0.043 \text{ V} + 0.209 \text{ V} = +0.252 \text{ V}$$

$$\text{V}', E_{\text{NHE}} = +0.480 \text{ V} + 0.209 \text{ V} = +0.689 \text{ V}$$

Therefore, the five reduction peak potentials of compound **2** are -0.351 V (I'), -0.193 V (II'), -0.039 V (III'), +0.252 V (IV') and +0.689 V (V') (*vs.* NHE), respectively.

## 2. Preparation of the Modified Electrodes

**ITO glass electrode:** The as-synthesized samples (2 mg) were ground and dispersed into a mixture of 1 mL of ethanol and 10  $\mu\text{L}$  of Nafion. The working electrodes were prepared by drop casting 10  $\mu\text{L}$  of this suspension onto an ITO glass substrate electrode surface (1  $\text{cm}^2$ ) and dried at room temperature. (Used for photocurrent-time measurement).

**Glassy carbon electrode (GCE):** Prior to be modified, the GCE was polished carefully with 0.05  $\mu\text{m}$  alumina powders and then cleaned with ethanol and deionized water. First 3 mg of the as-synthesized samples were ground during 30 min, and then 3 mg of carbon black (Vulcan XC-72R) were added to the above ground samples and the mixture was grounded for another 30 min.

Catalyst inks were prepared by adding 2 mg of the prepared catalyst powders into a mixture of water/ethanol = (750/250  $\mu\text{L}$ ) with 0.5 wt % Nafion (50  $\mu\text{L}$ ) and the suspension was ultrasonicated for 30 min. This suspension (5  $\mu\text{L}$ ) was transferred onto the washed GCE and dried in air at room temperature before electrochemical

experiments. (Used for cyclic voltammetry and impedance spectra measurements).

### 3. Synthesis of compounds 1 and 2

**[Cu<sup>II</sup><sub>5</sub>(2-ptza)<sub>6</sub>(H<sub>2</sub>O)<sub>4</sub>(GeW<sub>12</sub>O<sub>40</sub>)]·4H<sub>2</sub>O (1).** A mixture of K<sub>4</sub>[GeW<sub>12</sub>O<sub>40</sub>] (0.03 g, 0.095 mmol), CuCl<sub>2</sub>·2H<sub>2</sub>O (0.167 g, 0.98 mmol), 2-ptza (0.04 g, 0.272 mmol) and water (40 mL) was stirred for 2 h. The resulting solution was transferred to a Teflon lined autoclave and kept under autogenous pressure at 160 °C for 3 days with pH = 2.0 adjusted with 0.5 M HCl. After slow cooling to room temperature at a rate of 10 °C /h, blue block crystals of **1** were filtered, washed with distilled water and dried at room temperature (Yield, 65 %, based on W). Anal. Calcd. for GeW<sub>12</sub>O<sub>48</sub>Cu<sub>5</sub>H<sub>40</sub>N<sub>30</sub>C<sub>36</sub>: Ge, 1.706; W, 51.82; Cu, 7.463; H, 0.947; N, 9.87; C, 10.16 (%). Found: Ge, 1.783; W, 50.96; Cu, 7.561; H, 0.822; N, 9.92; C, 9.68 (%).

**[Cu<sup>I</sup><sub>2</sub>(ppz)<sub>4</sub>][H<sub>2</sub>GeW<sub>12</sub>O<sub>40</sub>]·8H<sub>2</sub>O (2).** Compound **2** was prepared by the above method except that the 2-ptza ligand was replaced by ppz (0.04 g, 0.27 mmol). After slow cooling to room temperature at a rate of 10 °C /h, dark red block crystals were filtered, washed with distilled water and dried at room temperature (Yield, 62 %, based on W). Anal. Calcd. for Cu<sub>2</sub>N<sub>12</sub>C<sub>32</sub>GeW<sub>12</sub>O<sub>48</sub>H<sub>46</sub>: Cu, 3.369; N, 4.455; C, 10.19; Ge, 1.926; W, 58.48; H, 1.229; Found: Cu, 3.472; N, 4.365; C, 11.23; Ge, 1.849; W, 59.68; H, 1.343.

### 4. X-ray Crystallography

Single crystal X-ray diffraction data collection for compounds **1** and **2** were performed using a Bruker Smart Apex CCD diffractometer with Mo-K $\alpha$  radiation at 296 K. Multi-scan absorption corrections were applied. The two structures were solved by Direct Methods and refined by full-matrix least-squares on  $F^2$  using the SHELXTL 97 crystallographic software package. Anisotropic displacement parameters were used to refine all non-hydrogen atoms. The organic hydrogen atoms were generated geometrically. All H atoms on C atoms were fixed at the calculated positions. The H atoms of the water molecules in **1** and **2** cannot be found from the

residual peaks and were directly included in the final molecular formula.

## 5. General process for photocatalytic hydrogen evolution

Photocatalytic hydrogen evolution experiments were performed in a quartz reaction vessel under a 500 W Xe lamp in 20 mL of a 1:2 mixture of H<sub>2</sub>O/acetone solution containing 20 % methanol (v/v) as electron sacrificial agent. The as-synthesized samples (5 mg) were used as photosensitizers and photocatalysts without co-catalysts. To remove the air inside and make sure that the reaction system was under anaerobic conditions, the reaction vessel was purged/evacuated with N<sub>2</sub> for at least 5 min before irradiation. The reaction solution was stirred continuously and cooled to 5 °C. The generated H<sub>2</sub> was characterized by GC 7890T instrument analysis using a 5 Å molecular sieve column (0.6 m × 3 mm), thermal conductivity detector, and N<sub>2</sub> as carrier gas.

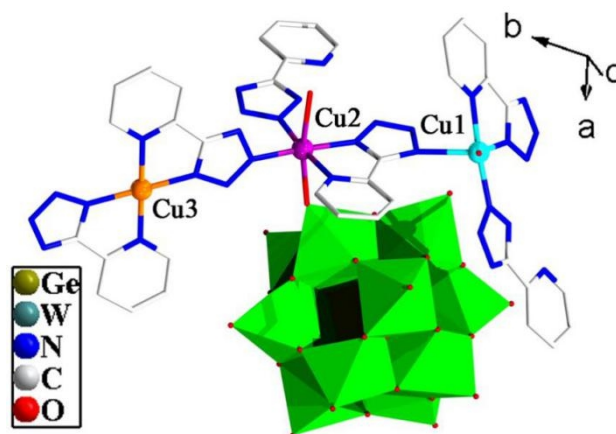

**Figure S1.** View of the asymmetric unit of **1**. All hydrogen atoms and free water molecules are omitted for clarity.

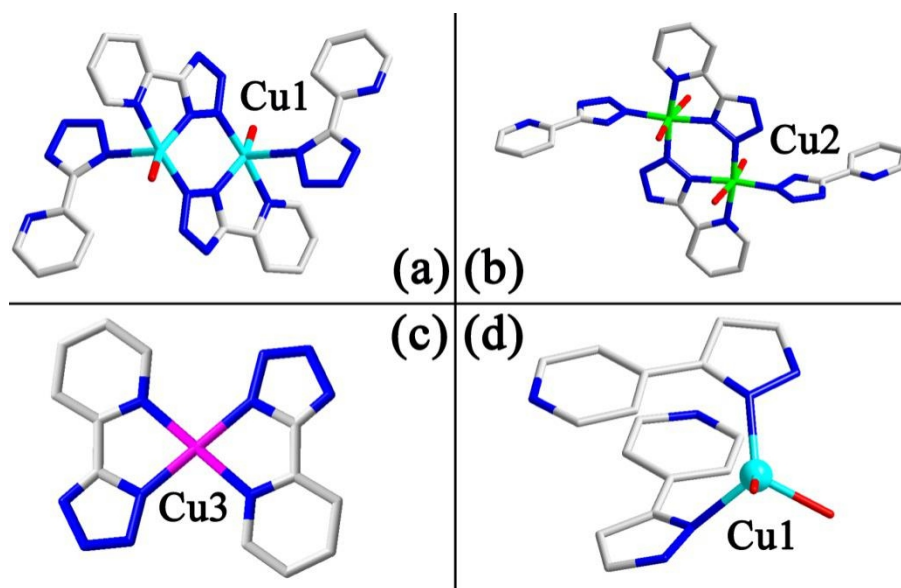

**Figure S2.** View of the structures of the Cu-azole complexes: a-c for compound **1** and d for compound **2**.

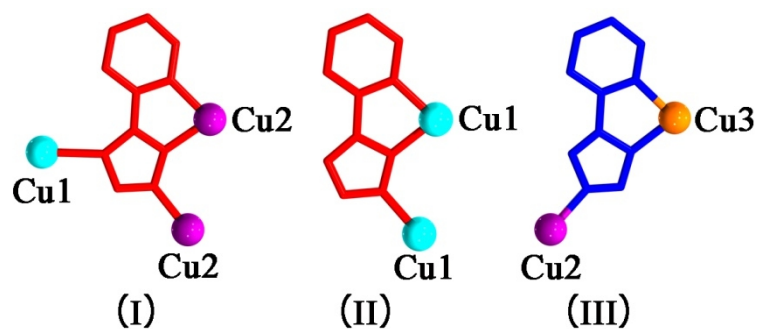

**Figure S3.** View of the three coordination modes of the deprotonated 2-ptz<sup>-</sup> ligands in compound **1**.

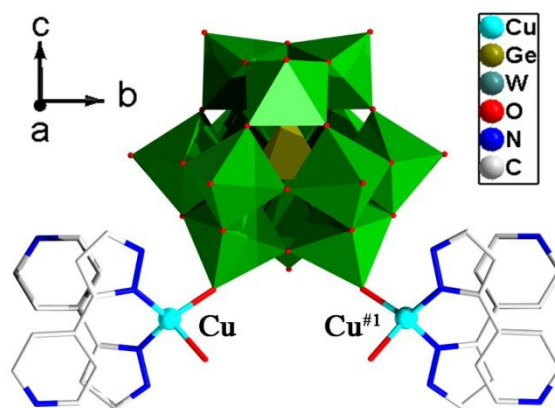

**Figure S4.** View of the structure of **2**. All hydrogen atoms and crystallization water molecules are omitted for clarity. (Symmetry codes: #1:  $x, 1-y, z$ )



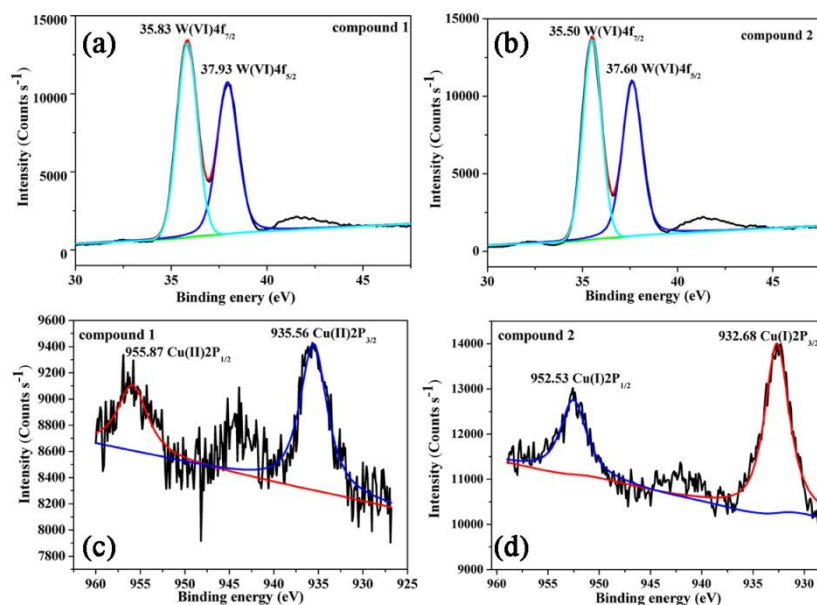

**Figure S5.** High-resolution XPS spectra of the Cu(2p) and W(4f) region for compounds **1** and **2**, before photocatalysis.

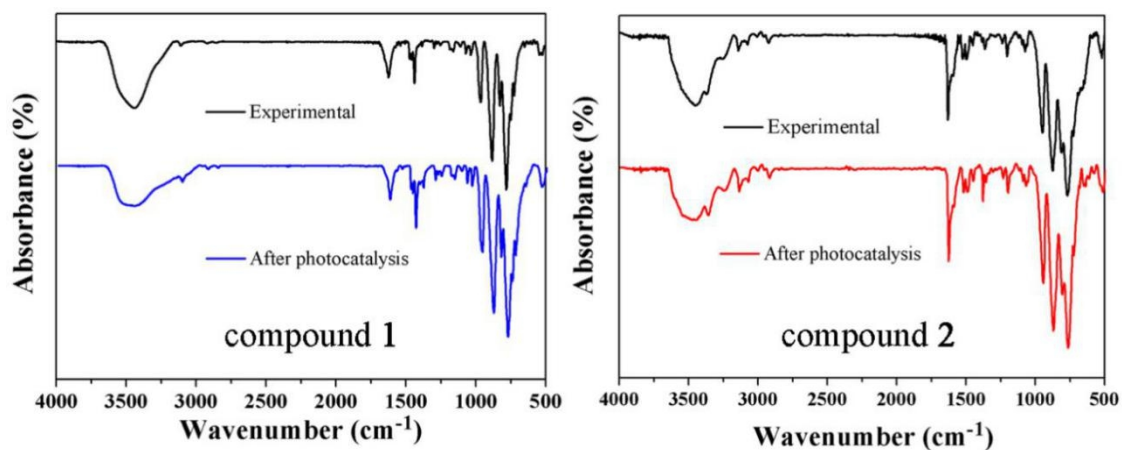

**Figure S6.** Experimental IR spectra of compounds **1** and **2** before (black lines) and after (blue and red lines) photocatalysis.

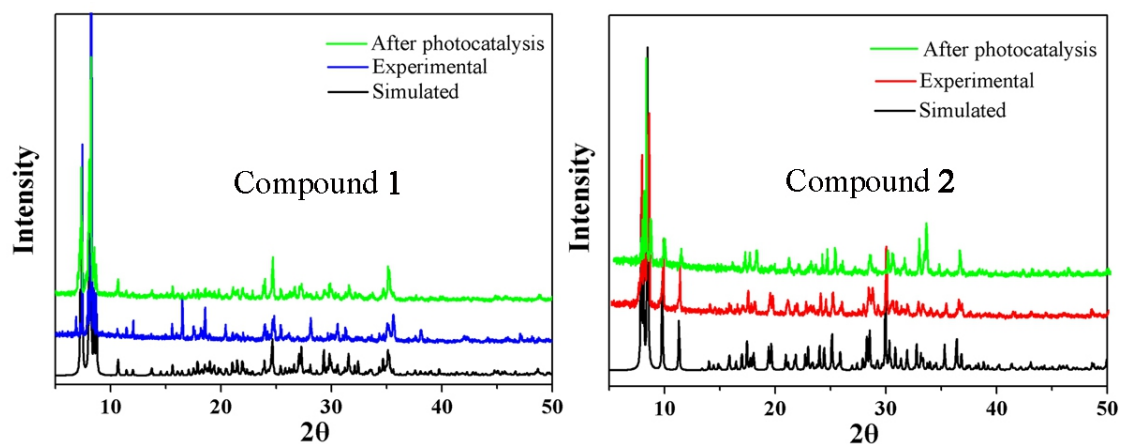

**Figure S7.** Simulated (black) PXRD diffractograms before (blue and red) and after (green) photocatalysis for compounds **1** and **2**.

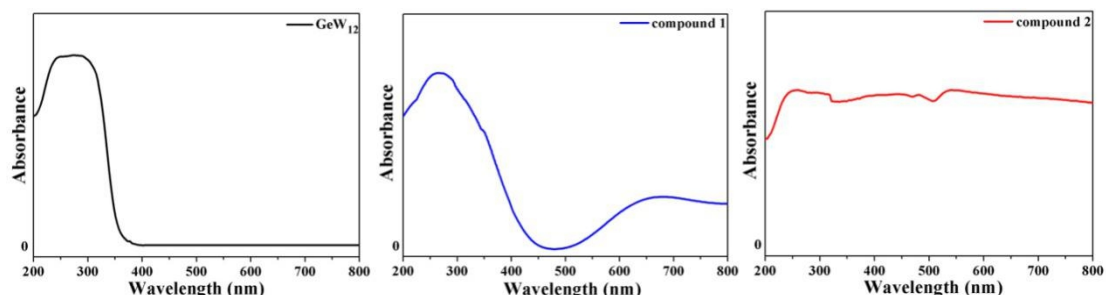

**Figure S8.** Solid state UV-Vis absorption spectra of GeW<sub>12</sub> polyanion (black line), compound **1** (blue line), and compound **2** (red line).

**Table S1.** Photocatalytic H<sub>2</sub> production conditions for compounds **1** and **2**.

| Catalyst                                 | Amount | Light (λ/nm) | Electron donor     | H <sub>2</sub> production rate            |
|------------------------------------------|--------|--------------|--------------------|-------------------------------------------|
| Compound <b>1</b> <sup>a</sup>           | 5 mg   | No           | CH <sub>3</sub> OH | No                                        |
| Compound <b>1</b> <sup>a</sup>           | no     | 350-780      | CH <sub>3</sub> OH | No                                        |
| Compound <b>1</b> <sup>a</sup>           | 5 mg   | 350-780      | No                 | No                                        |
| Compound <b>1</b> <sup>a</sup>           | 5 mg   | 350-780      | CH <sub>3</sub> OH | 3.81 mmol g <sup>-1</sup> h <sup>-1</sup> |
| Compound <b>1</b> <sup>b</sup>           | 5 mg   | 350-780      | CH <sub>3</sub> OH | 0.17 mmol g <sup>-1</sup> h <sup>-1</sup> |
| Compound <b>1</b> <sup>c</sup>           | 5 mg   | 350-780      | CH <sub>3</sub> OH | 0.73 mmol g <sup>-1</sup> h <sup>-1</sup> |
| Compound <b>1</b> <sup>d</sup>           | 5 mg   | 350-780      | CH <sub>3</sub> OH | 0.46 mmol g <sup>-1</sup> h <sup>-1</sup> |
| Compound <b>1</b> <sup>e</sup>           | 5 mg   | 350-780      | CH <sub>3</sub> OH | 1.02 mmol g <sup>-1</sup> h <sup>-1</sup> |
| Compound <b>2</b> <sup>a</sup>           | 5 mg   | 400-780      | CH <sub>3</sub> OH | Trace                                     |
| (ppz+GeW <sub>12</sub> ) <sup>a</sup>    | 5 mg   | 400-780      | CH <sub>3</sub> OH | No                                        |
| (2-ptza+GeW <sub>12</sub> ) <sup>a</sup> | 5 mg   | 400-780      | CH <sub>3</sub> OH | No                                        |
| Compound <b>1</b> <sup>a</sup>           | 5 mg   | 400-780      | CH <sub>3</sub> OH | No                                        |
| Compound <b>1</b> <sup>a</sup>           | 5 mg   | 350-400      | CH <sub>3</sub> OH | Trace                                     |

Reaction conditions: (a) 20 mL of a 1:2 mixture of H<sub>2</sub>O/acetone solution containing 20 % methanol (v/v) as electron sacrificial agent. (b) 20 mL of H<sub>2</sub>O containing 20 % methanol (v/v) as electron sacrificial agent. (c) 20 mL of a 1:2 mixture of H<sub>2</sub>O/DMF solution containing 20 % methanol (v/v) as electron sacrificial agent. (d) 20 mL of a 1:2 mixture of H<sub>2</sub>O/ethanol solution containing 20 % methanol (v/v) as electron sacrificial agent. (e) 20 mL of a 1:2 mixture of H<sub>2</sub>O/acetonitrile solution containing 20 % methanol (v/v) as electron sacrificial agent.

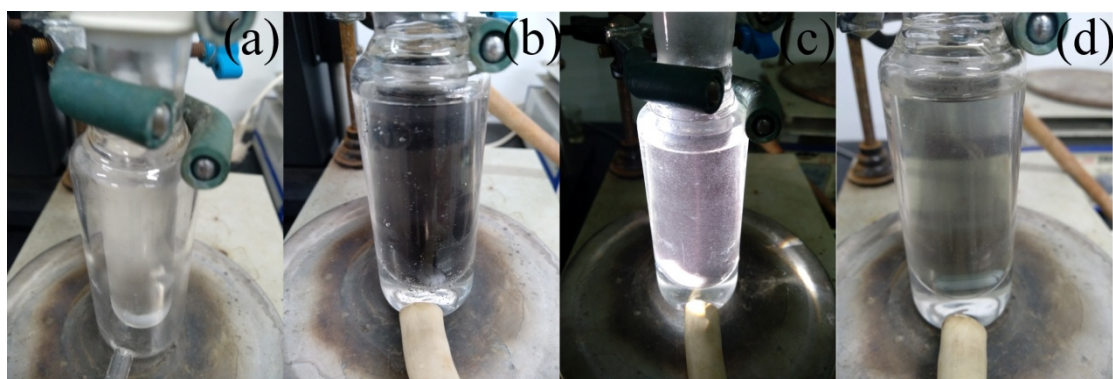

**Figure S9.** Optical images: (a) Suspension of compound **1** before irradiation. (b) Heteropolyblue (HPB) suspension of compound **1** after irradiation (Xe lamp off); (c) HPB suspension of compound **1** under irradiation (Xe lamp on); (d) Suspension of compound **1** after exposure to O<sub>2</sub>.

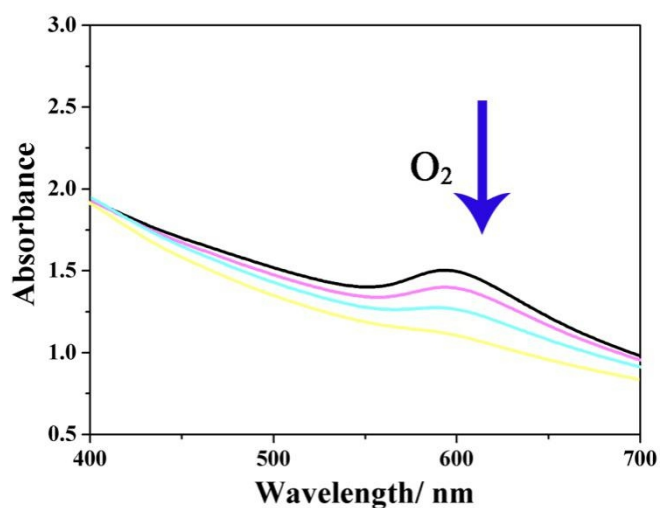

**Figure S10.** Solution UV-Vis absorption spectrum of the HPB state of compound **1** after exposure to a continuous flow of O<sub>2</sub>.

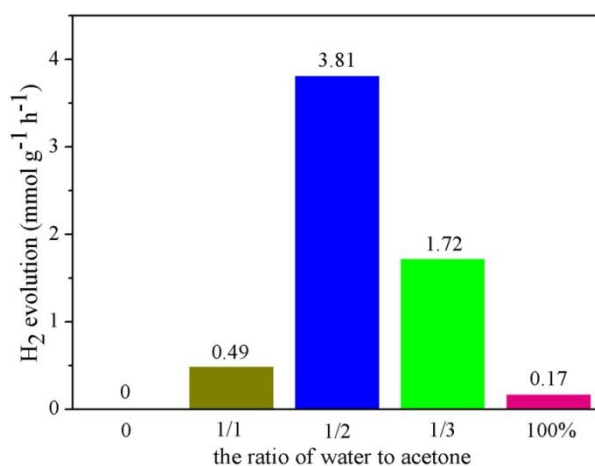

**Figure S11.** Comparison of the photocatalytic H<sub>2</sub> evolution rates of 5 hours for

compound **1** for different water:acetone ratios.

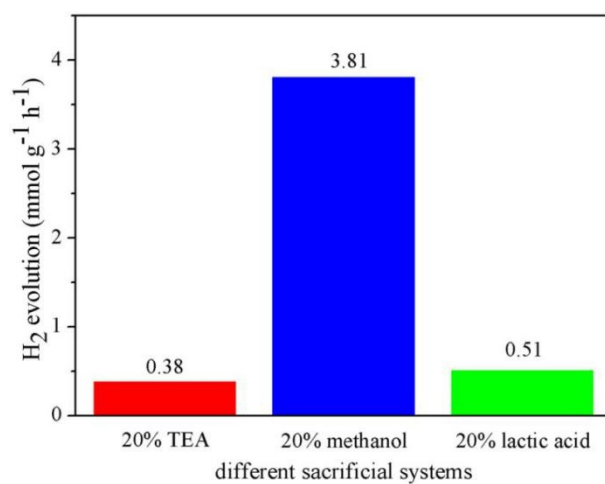

**Figure S12.** Comparison of the photocatalytic H<sub>2</sub> evolution rates of 5 hours for compound **1** for different sacrificial reagents.

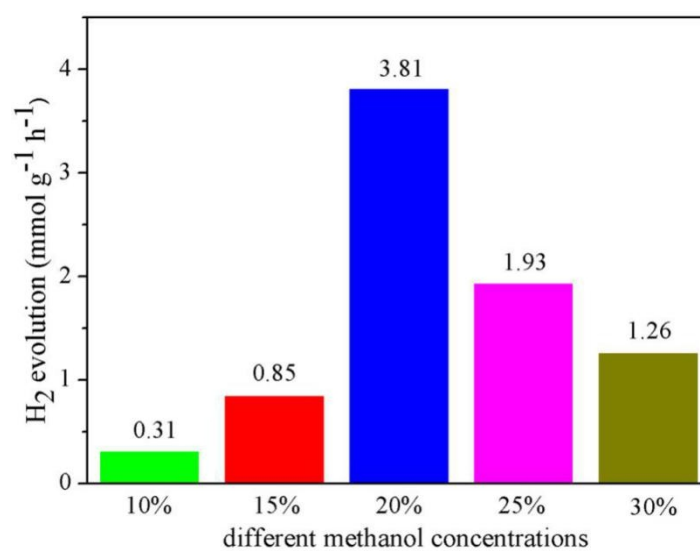

**Figure S13.** Comparison of the photocatalytic H<sub>2</sub> evolution rates of 5 hours for compound **1** for different methanol concentrations.

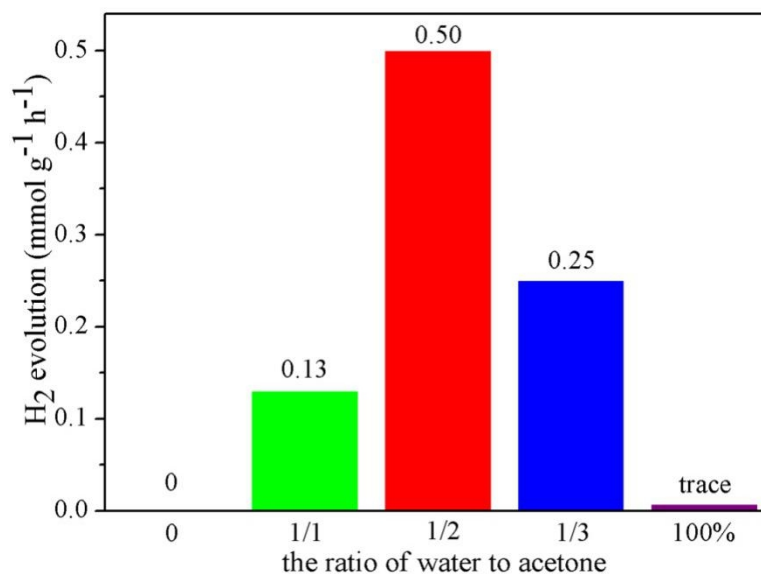

**Figure S14.** Comparison of the photocatalytic H<sub>2</sub> evolution rates of 5 hours for compound **2** for different water:acetone ratios.

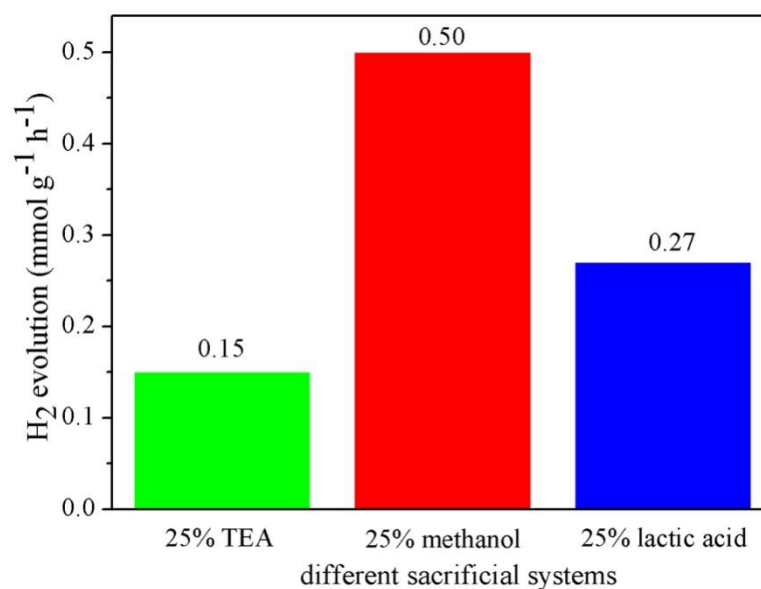

**Figure S15.** Comparison of the photocatalytic H<sub>2</sub> evolution rates of 5 hours for compound **2** for different sacrificial reagents.

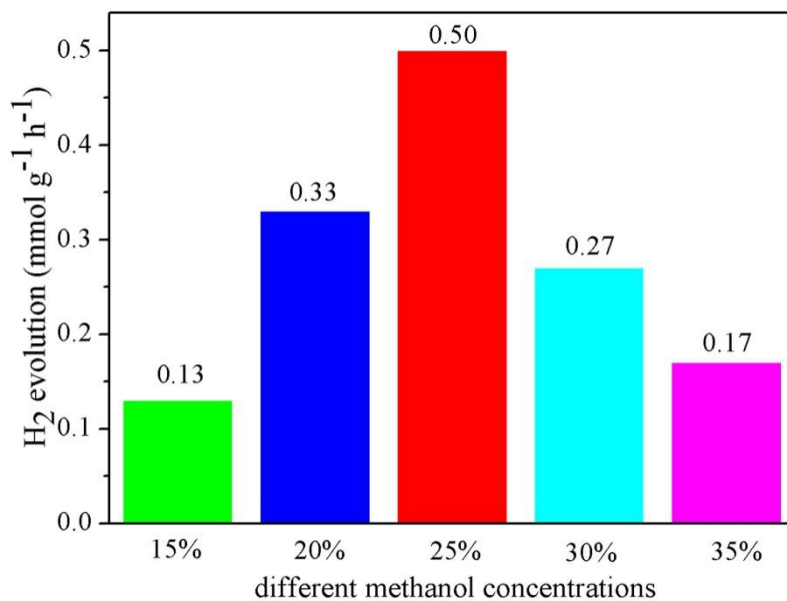

**Figure S16.** Comparison of the photocatalytic H<sub>2</sub> evolution rates of 5 hours for compound **2** for different methanol concentrations.

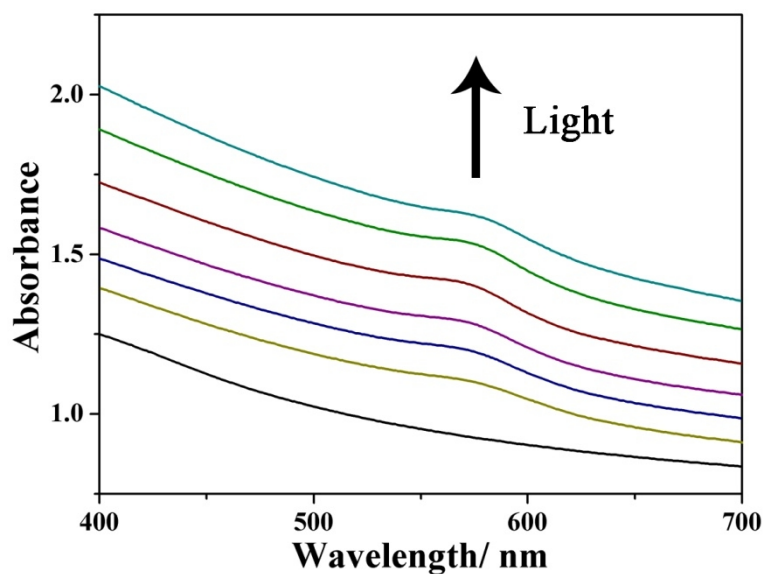

**Figure S17.** Liquid state UV-Vis absorption spectrum of HPB state of compound **2** under Xe irradiation with 300-400nm wavelength; irradiation time: 0, 1, 3, 5, 7, 9, 11min.

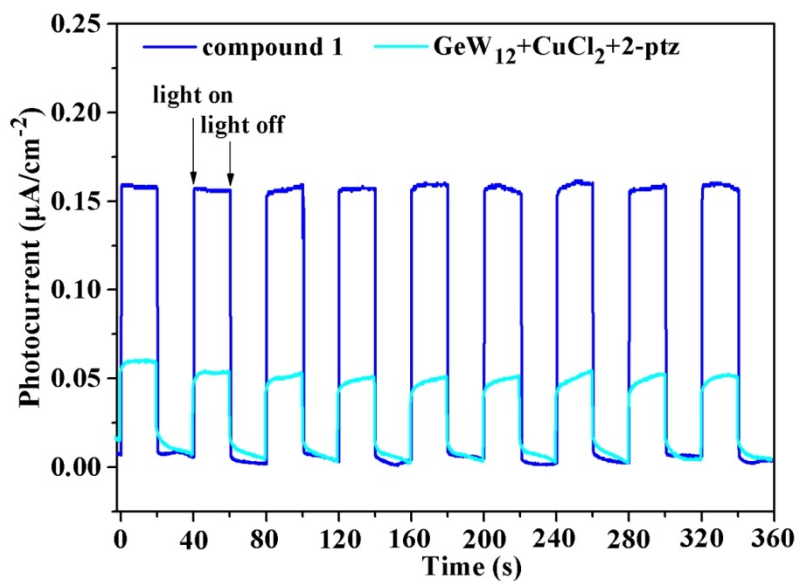

**Figure S18.** Comparison transient photocurrent responses for compound **1** and the physical mixture of  $\text{GeW}_{12} + \text{CuCl}_2 + 2\text{-ptz}$ .

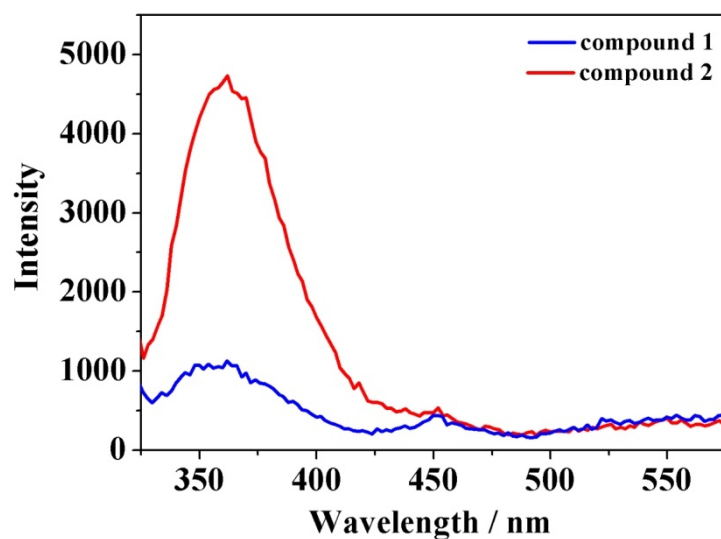

**Figure S19.** Photoluminescence spectra of compounds **1** and **2** with the excitation wavelength at 300 nm.

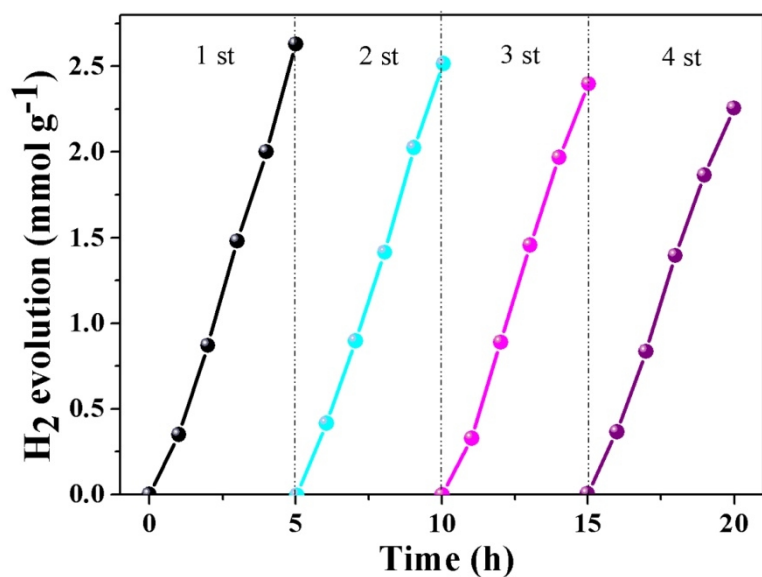

**Figure S20.** Time evolution of the photocatalytic H<sub>2</sub> production for compound 2.

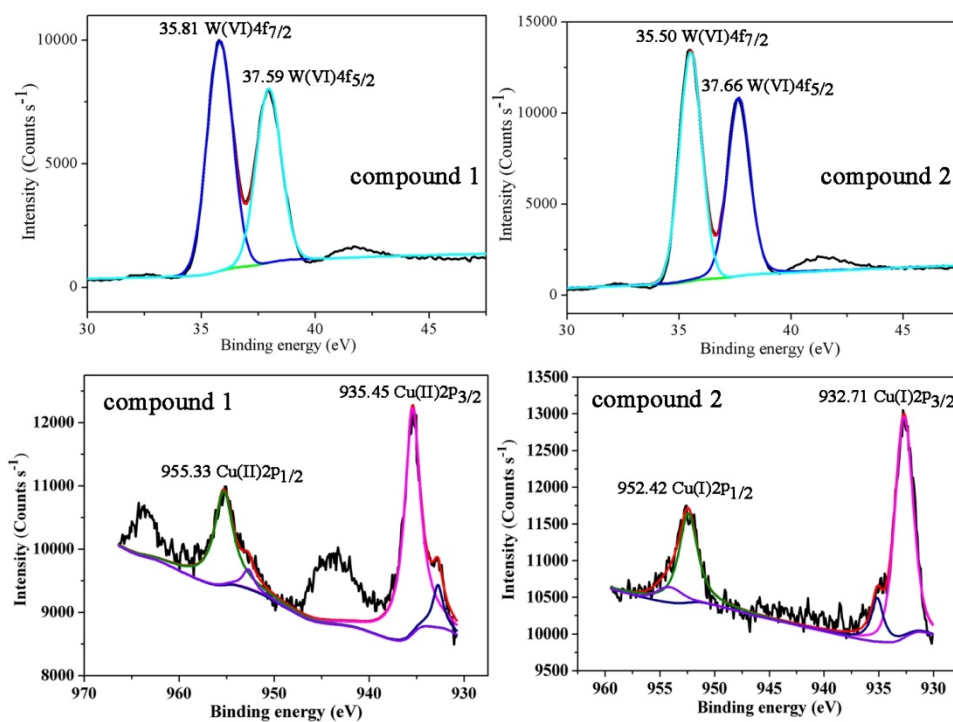

**Figure S21.** High-resolution XPS spectrum of the W(4f) and Cu(2p) region for compounds 1 and 2 after photocatalysis.



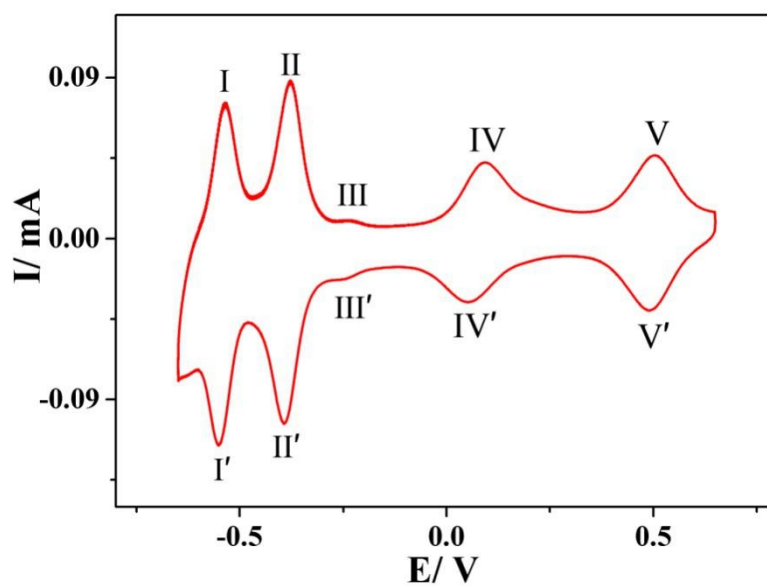

**Figure S22.** CV curve of compound **2** in a 0.5 M H<sub>2</sub>SO<sub>4</sub> solution (pH = 0.28) with a scan rate of 0.1 V s<sup>-1</sup>. (vs. Ag/AgCl)

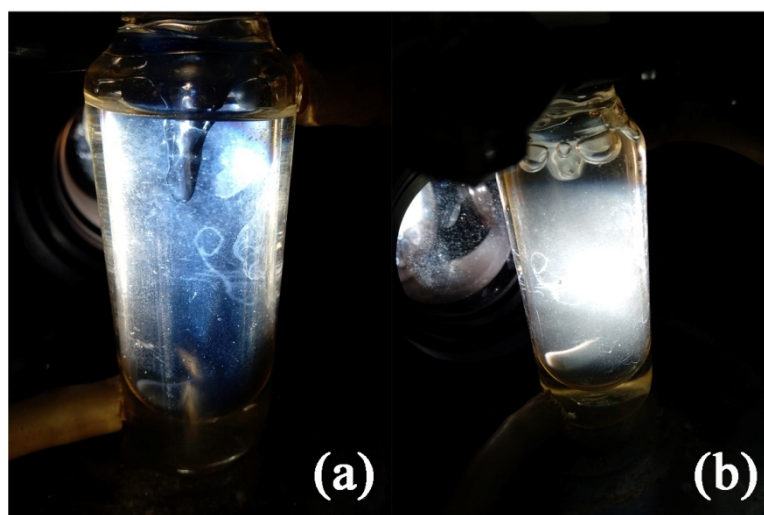

**Figure S23.** (a) HPBs state of compound **1** solution under Xe light ( $\lambda > 350$  nm). (b) HPBs state of compound **1** solution after irradiation with  $\lambda > 400$  nm.

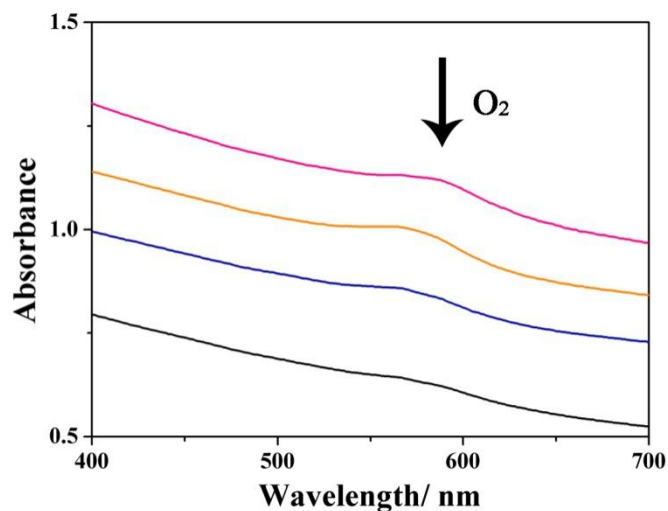

**Figure S24.** Solution UV-Vis absorption spectrum of the HPB state of compound 2 after exposure to a continuous flow of O<sub>2</sub>.

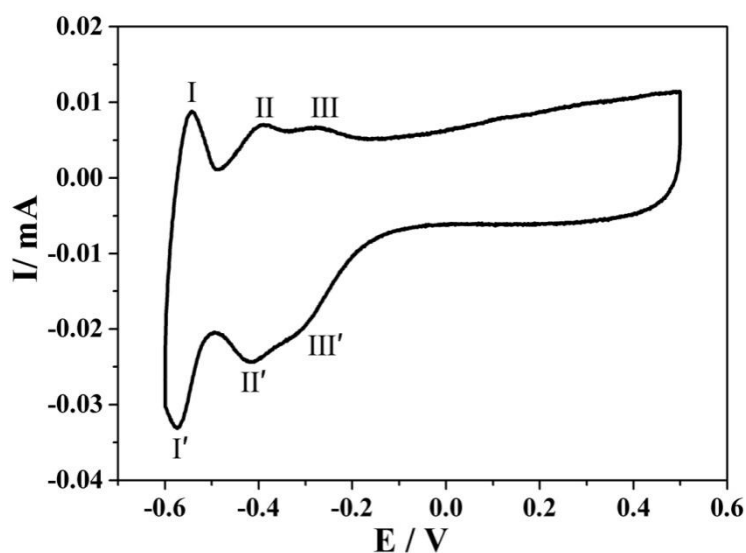

**Figure S25.** CV curve of GeW<sub>12</sub> precursor in a 0.5 M H<sub>2</sub>SO<sub>4</sub> solution (pH = 0.28) with a scan rate of 0.1 V s<sup>-1</sup>. (vs. Ag/AgCl)

### ***Section 3 Supplementary Discussion***

#### **The photocatalytic mechanism for GeW<sub>12</sub> (without copper)**

As a photosensitizer, GeW<sub>12</sub> polyanions can also act as photocatalysis to produce hydrogen due to its reduction potential meeting the conditions for hydrogen evolution from reducing water. The CV curve of GeW<sub>12</sub> in a 0.5 M H<sub>2</sub>SO<sub>4</sub> solution at a scan rate of 0.1 V s<sup>-1</sup> is presented in Fig. S25. The GeW<sub>12</sub> shows three pairs of redox peaks (I-I',

II-II' and III-III') with the reduction potentials at -0.574 V (I'), -0.415 V (II') and -0.300 V (III') (vs. Ag/AgCl). According to the formula,  $E_{\text{RHE}} = E_{\text{AgCl}} + 0.059 \text{ pH} + E_{\text{AgCl}}^{\ominus}$ ,  $E_{\text{AgCl}}^{\ominus}$  (3.0 M NaCl) = 0.209 V at 25°C, and we get the corresponding reduction potential are -0.365 V (I'), -0.206 V (II'), and -0.091 V (III') (vs. NHE). They are both negative enough (the potential of H<sup>+</sup>/H<sub>2</sub> is 0 V vs. NHE) to drive H<sub>2</sub> production. Therefore, GeW<sub>12</sub> polyanion can also be used as a catalytic site. However, when GeW<sub>12</sub> is used as catalyst, the photogenerated electrons and holes are not separated effectively, so the photocatalytic hydrogen production efficiency is very low.

#### ***Section 4 References***

1. S. J. Hong, S. Lee, J. S. Jang and J. S. Lee, *Energy Environ. Sci.*, 2011, **4**, 1781-1788.
